# Supplementary material
Source: ML conference proceedings conference paper supplement (https://proceedings.neurips.cc/paper_files/paper/2022/hash/e89e8f84626197942b36a82e524c2529-Abstract.html)
Supplement: Supplementary file 1 [file e89e8f84626197942b36a82e524c2529-Supplemental-Conference.pdf]

## 1 A Derivation of variational inference

2 The posterior distribution of the latent variable is  $p(z|G) = \frac{p(G|z)p(z)}{p(G)}$ , where  $p(G)$  is in-  
3 tractable. Hence we approximate it via  $q_\phi(z|G)$  by minimizing  $KL(q_\phi(z|G)||p(z|G)) =$   
4  $-\int q_\phi(z|G) \log \frac{p(G|z)p(z)}{q_\phi(z|G)} dz + \log p(G)$ . Since  $G$  is given, then minimizing  $KL(q_\phi(z|G)||p(z|G))$   
5 is equivalent to maximizing the evidence lower bound (ELBO):  $\int q_\phi(z|G) \log \frac{p(G|z)p(z)}{q_\phi(z|G)} dz =$   
6  $\mathbb{E}_{q_\phi(z|G)}[\log p(G|z)] - KL(q_\phi(z|G)||p(z))$ . If we suppose  $z = (z_j, z_g)$ , then maximizing the  
7 ELBO can be formulated into maximizing the objective of VAE as in Eq. (4).

## 8 B Proof of Theorem 1

9 *Proof.* We assume that the periodic graph is simulated from two latent factors as  $G = \text{Sim}(F_l, F_g)$ ,  
10 where  $F_l$  is the factor that is related to the local information, such as the structure of the repeating  
11 pattern and how repeating patterns are linked to each other.  $F_g$  is defined as the factor of the global  
12 information, including how many repeating patterns the graph contains and their spatial arrangements.  
13 The goal is to prove that  $z_l$  captures and only captures the information of  $F_l$ , and  $z_g$  captures and  
14 only captures the information of  $F_g$ . Thus, based on the information theory, we need to prove  
15  $I(z_l, F_l) = H(F_l)$ ,  $I(z_l, F_g) = 0$ ,  $I(z_g, F_g) = H(F_g)$ , and  $I(z_g, F_l) = 0$ . Here  $I(a, b)$  refers to the  
16 mutual information between  $a$  and  $b$ , and  $H(*)$  refers to the information entropy of an element.

17 Based on the reconstruction error, after the model is well optimized, we can have all the latent variables  
18 to reconstruct the whole graph  $G$ . We also have  $z_l \perp z_g$  and  $F_l \perp F_g$  consider that the  $z_l$  and  $z_g$   
19 are disentangled. Thus we have  $I(z_l, F_l) + I(z_g, F_l) = H(F_l)$  and  $I(z_l, F_g) + I(z_g, F_g) = H(F_g)$ .  
20 Then we combine them to get

$$I(z_l, F_l) + I(z_l, F_g) + I(z_g, F_l) + I(z_g, F_g) = H(F_l) + H(F_g). \quad (1)$$

21 (1) First, we prove that  $I(z_l, F_g) = 0$ . Suppose we have two graphs  $(G_1, G_2)$  with the same repeat  
22 pattern (i.e.  $F_{l,1} = F_{l,2}$  and different global information (i.e.  $F_{g,1} \neq F_{g,2}$ ). Regarding the latent  
23 variables, We have  $I(z_{l,1}, F_{l,1}) + I(z_{l,1}, F_{g,1}) = H(z_{l,1})$  and  $I(z_{l,2}, F_{l,2}) + I(z_{l,2}, F_{g,2}) = H(z_{l,2})$ .  
24 Based on the condition (i.e.subject to) of the loss function, we enforce  $z_{l,1} = z_{l,2}$ . Thus, we have

$$I(z_{l,1}, F_{l,1}) + I(z_{l,1}, F_{g,1}) = I(z_{l,2}, F_{l,2}) + I(z_{l,2}, F_{g,2}). \quad (2)$$

25 Since  $F_{l,1} = F_{l,2}$ , we have  $I(z_{l,1}, F_{l,1}) = I(z_{l,2}, F_{l,2})$ . Then we should have  $I(z_{l,1}, F_{g,1}) =$   
26  $I(z_{l,2}, F_{g,2})$ . However, since  $F_{g,1} \neq F_{g,2}$ , the only situation to meet the requirement is  
27  $I(z_{l,1}, F_{g,1}) = I(z_{l,2}, F_{g,2}) = 0$ . Thus, to generalize, for any graph, we have  $I(z_l, F_g) = 0$ .

28 (2) Second, we prove that  $I(z_g, F_g) = H(F_g)$ . Based on the conclusion that  $I(z_l, F_g) = 0$  from last  
29 step, and the conclusion from the second paragraph that  $I(z_l, F_g) + I(z_g, F_g) = H(F_g)$ , we can get  
30  $I(z_g, F_g) = H(F_g)$ .

31 (3)Third, we prove that  $I(z_g, F_l) = 0$ . We can rewrite the loss function as:

$$\begin{aligned} \max_{\theta, \phi} I(z_l, G) + I(z_g, G) & \quad (3) \\ I(G, z_l) & \leq I_1 \\ I(G, z_g) & \leq I_2 \end{aligned}$$

32 The detail of this derivation is provided in the work proposed by [2]. When  $I_2$  is defined as  
33  $I_2 \leq H(F_g)$ , we can have  $I(G, z_g) \leq H(F_g)$ . Since  $G = \text{Sim}(F_l, F_g)$ , it can be written as

$$I(z_g, F_l) + I(z_g, F_g) \leq H(F_g). \quad (4)$$

34 From the second step, we already have  $I(z_g, F_g) = H(F_g)$ . Thus, we have  $I(z_g, F_l) = 0$ .

35 (4) Forth, we prove  $I(z_l, F_l) = H(F_l)$ . Based on the conclusion from the first three steps, we have  
36  $I(z_l, F_g) = 0$ ,  $I(z_g, F_g) = H(F_g)$ , and  $I(z_g, F_l) = 0$ . When we combine these three three equations  
37 with Eq.(1), we can have  $I(z_l, F_l) = H(F_l)$ .

38 Given the above four steps, we have finally proved the four equations  $I(z_l, F_l) = H(F_l)$ ,  $I(z_l, F_g) =$   
39  $0$ ,  $I(z_g, F_g) = H(F_g)$ , and  $I(z_g, F_l) = 0$ , which indicate that the latent vector  $z_l$  capture and only  
40 capture local patterns and the latent vector  $z_g$  capture and only capture global patterns.  $\square$

Table 1: Overview of datasets in experiments ( $|\mathbf{G}|$  is the total number periodic graphs in the dataset;  $|\mathcal{V}|_{avg}$  is the average graphs size of the dataset;  $|\mathcal{E}|_{avg}$  is the average edges of the graph in the dataset;  $|\mathbf{U}|$  is the types of basic units in the dataset;  $|U|_{avg}$  is the average size of basic units in the dataset)

| Property              | QMOF    | MeshSeg | Synthetic |
|-----------------------|---------|---------|-----------|
| $ \mathbf{G} $        | 3,780   | 300     | 46,500    |
| $ \mathcal{V} _{avg}$ | 151.42  | 662.13  | 71.09     |
| $ \mathcal{E} _{avg}$ | 1004.13 | 1747.24 | 107.34    |
| $ \mathbf{U} $        | 14      | 1       | 3         |
| $ U _{avg}$           | 18.93   | 3       | 4.33      |

Table 2: Implementation details of PGD-VAE. GIN represents the layer of Graph Isomorphism Network; ReLU represents the Rectified Linear Unit activation function; FC is the fully connected layer; Sigmoid is the sigmoid activation function.

| Layer  | Local-pattern encoder                     | Global-pattern encoder | Local decoder | Neighborhood decoder | Global decoder             | Assembler                   |
|--------|-------------------------------------------|------------------------|---------------|----------------------|----------------------------|-----------------------------|
| Input  | A                                         | A                      | $z_l$         | $z_l$                | $z_g$                      | $A^{(l)}, A^{(g)}, A^{(n)}$ |
| Layer1 | GIN+ReLU                                  | GIN+ReLU               | FC+ReLU       | FC+ReLU              | FC+ReLU                    | -                           |
| Layer2 | GIN+ReLU                                  | GIN+ReLU               | FC+ReLU       | FC+ReLU              | FC+ReLU                    | -                           |
| Layer3 | GIN+ReLU                                  | GIN+ReLU               | Sigmoid       | Sigmoid              | Sigmoid                    | -                           |
| Layer4 | Node clustering                           | Sum pooling            | -             | -                    | Replace diagonal with zero | -                           |
| Layer5 | Concatenate representative node embedding | -                      | -             | -                    | -                          | -                           |
| Output | $z_l$                                     | $z_g$                  | $A^{(l)}$     | $A^{(n)}$            | $A^{(g)}$                  | A                           |

## 41 C Dataset

42 Two real-world datasets and one synthetic dataset were employed to evaluate the performance of  
43 PGD-VAE and other comparison models.

44 **QMOF dataset** The Quantum MOF (QMOF) is a publically available database of computed quantum-  
45 chemical properties and molecular structures of 21,059 experimentally synthesized metal–organic  
46 frameworks (MOF) [4]. In total 3,780 MOFs were selected for the experiment. The statistics of the  
47 QMOF dataset was summarized in Appendix, Table 1.

48 **MeshSeg dataset** The 3D Mesh Segmentation project contains 380 meshes for quantitative analysis  
49 of how people decompose objects into parts and for comparison of mesh segmentation algorithms [1].  
50 Meshes in MeshSeg dataset can be formed into graphs of triangle grids. We made 10 replicates for  
51 each mesh. The statistics of MeshSeg dataset has been summarized in Appendix, Table 1.

52 **Synthetic dataset** The synthetic dataset contains three types of basic units: triangle, grid and hexagon.  
53 The statistics of the synthetic dataset has been summarized in Table 4. We augmented each basic  
54 unit to contain more basic units and finally we obtained 15,500 graphs for each local pattern. The  
55 statistics of synthetic dataset has been summarized in Appendix, Table 1.

## 56 D Implementation details of PGD-VAE

57 The implementation details of PGD-VAE are shown in Table 2. All comparison models were  
58 implemented by their default settings. The assembler has the form of matrix operation following the  
59 Eq. (3) in the main text and does not have a structure of neural network.

60 To solve the permutation invariance issue in graph generation, one can use BFS-based-ordering,  
61 which is commonly employed by existing works for graph generation such as GraphRNN [5] and  
62 GRAN [3]. The rooted node can be selected as the node with the largest node degree in the graph.  
63 Then BFS starts from the rooted node and visits neighbors in a node-degree-descending order. Such a  
64 BFS-based-ordering works well in terms of stability, which is similar to the situation in GraphRNN  
65 and GRAN.

## 66 E Case study details

67 In our case study, we distinguish atoms by their node degree within the graph of the unit cell (i.e.,  
68  $A^{(l)}$ ). For instance, if the node has the degree of 2 in one unit cell, then it can be designed as an  
69 inorganic atom carrying a double positive charge (e.g.,  $\text{Cu}^{2+}$  or  $\text{Ag}^{2+}$ ) connected to the surrounding  
70 organic atoms via metallic bonding, or a negative organic ion ( $\text{O}^{2-}$ ) connecting with inorganic ions  
71 (e.g.,  $\text{K}^+$ ) or other organic atoms (e.g.,  $\text{H}^+$ ). Three MOFs have been illustrated in Figure 4 of the

72 main article, in which different atoms can be distinguished by the color and size. The figure is  
73 constructed via the ASE package by replacing the atom number with the degree of the nodes.

## 74 F Evaluating Scalability

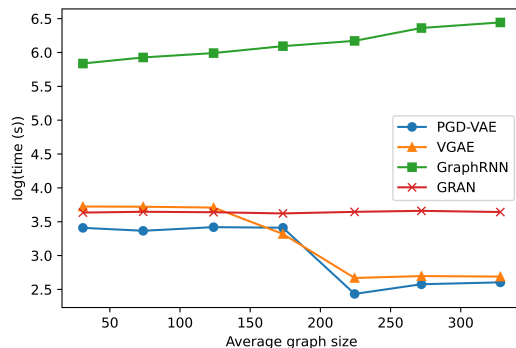

Figure 1: Scalability evaluation by running 10 epochs of PGD-VAE and comparison models.

75 We conducted experiments to evaluate the time complexity of PGD-VAE and comparison models, as  
76 shown in Figure 1 of Appendix. In the experiments, we recorded and logarithmized the time (s) to run  
77 10 epochs on graphs in stratified synthetic dataset according to average graph size with PGD-VAE  
78 and comparison models. Aligned with the theoretical analysis, GraphVAE consumes the most of  
79 time compared with other models. Given the synthetic dataset, GRAN spends slightly more time  
80 than PGD-VAE and VGAE, while PGD-VAE and VGAE are less computational intensive and have  
81 comparable performance.

## 82 G Generate atom types of QMOF data

83 We adapt PGD-VAE to be able to predict atom types of MOFs. Atom types are predicted by a  
84 prediction function modeled by MLP with the local embedding  $z_l$  as the input. Since periodic graphs  
85 contain basic units as repeated patterns, we only need to predict atom types of a basic unit and assign  
86 them to other basic units. Two generated MOFs that contain two basic units from PGD-VAE are  
87 show in Figure 2.

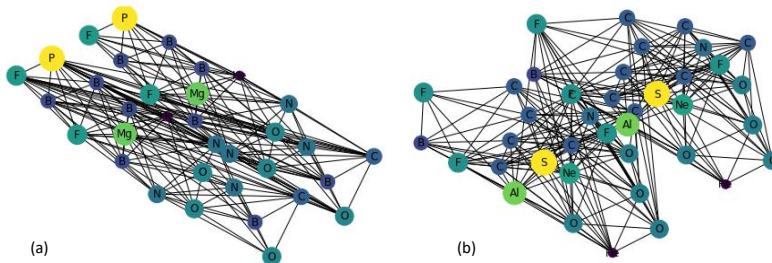

Figure 2: Generated MOFs from PGD-VAE. (a)  $MgAl_2B_5F_2O_3C$ ; (b)  $AlNeBSF_3O_4C_7$

## 88 References

- 89 [1] X. Chen, A. Golovinskiy, and T. Funkhouser. A benchmark for 3D mesh segmentation. *ACM*  
90 *Transactions on Graphics (Proc. SIGGRAPH)*, 28(3), Aug. 2009.
- 91 [2] X. Guo, Y. Du, and L. Zhao. Deep generative models for spatial networks. In *Proceedings of the*  
92 *27th ACM SIGKDD Conference on Knowledge Discovery & Data Mining*, pages 505–515, 2021.

- 93 [3] R. Liao, Y. Li, Y. Song, S. Wang, W. Hamilton, D. K. Duvenaud, R. Urtasun, and R. Zemel. Effi-  
94 cient graph generation with graph recurrent attention networks. *Advances in Neural Information*  
95 *Processing Systems*, 32, 2019.
- 96 [4] A. S. Rosen, S. M. Iyer, D. Ray, Z. Yao, A. Aspuru-Guzik, L. Gagliardi, J. M. Notestein, and  
97 R. Q. Snurr. Machine learning the quantum-chemical properties of metal–organic frameworks  
98 for accelerated materials discovery. *Matter*, 4(5):1578–1597, 2021.
- 99 [5] J. You, R. Ying, X. Ren, W. Hamilton, and J. Leskovec. Graphrnn: Generating realistic graphs  
100 with deep auto-regressive models. In *International conference on machine learning*, pages  
101 5708–5717. PMLR, 2018.
